# Supplementary material for: Enantiomorphic symmetry breaking in crystallization of molten sodium chlorate
Source: Royal Society of Chemistry journal article supplement (doi:10.1039/c0cc02563a), 2010-01-01
Supplement: c0cc02563a.pdf [file c0cc02563a.pdf]

## Enantiomorphic symmetry breaking in crystallization of molten sodium chlorate

Martin R. Ward, Gary W. Copeland, Andrew J. Alexander\*

*School of Chemistry, University of Edinburgh, Edinburgh, Scotland, EH9 3JJ*

*\*e-mail: andrew.alexander@ed.ac.uk*

### A. Poisson model for symmetry breaking

We assume two choices of enantiomorph,  $d$  or  $l$ , for a nucleus, so for  $r$  nuclei there are  $2^r$  permutations. Probability that all of the  $r$  nuclei are  $d$  is therefore  $2^{-r}$ . Probability of a mixed nucleus ( $dl$ ) is therefore

$$1 - 2 \cdot 2^{-r} = 1 - 2^{(1-r)}. \quad (\text{S1})$$

The Poisson probability  $P(r, \lambda) \sim \frac{\lambda^r}{r!}$ , where  $\lambda$  is the Poisson parameter.<sup>1</sup> If we normalize the sum we have  $\sum_{r=1}^{\infty} P(r, \lambda) = e^{\lambda} - 1$ , so that normalized probability is found to be

$$P(r, \lambda) = \frac{\lambda^r}{(e^{\lambda} - 1)r!}. \quad (\text{S2})$$

Note that this distribution differs from the regular Poisson expression in that it explicitly excludes  $r = 0$ , i.e., we are assuming that nucleation definitely occurs.

The probability of obtaining an overall mixed ( $dl$ ) sample is obtained as follows,

$$\begin{aligned} P_{dl}(\lambda) &= P(1, \lambda) \cdot (1 - 2^0) + P(2, \lambda) \cdot (1 - 2^{-1}) + \dots \\ &= \sum_{r=1}^{\infty} P(r, \lambda) \cdot (1 - 2^{(1-r)}) = \frac{e^{\lambda/2} - 1}{e^{\lambda/2} + 1} \end{aligned} \quad (\text{S3})$$

Similarly, the probability of a pure ( $d$  or  $l$ ) sample is obtained as,

$$P_{d \text{ or } l}(\lambda) = \frac{2}{e^{\lambda/2} + 1}. \quad (\text{S4})$$

The final expressions S3 (solid curve) and S4 (dashed curve) are plotted in Fig. 1 of the accompanying communication.

## B. Poisson arrival process

For a Poisson arrival process, the *inter-arrival* times (i.e., time between events) are exponentially distributed as:<sup>1,2</sup>

$$f(t) = \lambda e^{-\lambda t}. \quad (\text{S5})$$

The mean inter-arrival time is related to the Poisson rate,  $\langle t \rangle = 1/\lambda$ .

We model the experimental times to nucleate, taking  $t = 0$  as the time that the sample first reaches 248 °C during cooling. The data can be represented as a histogram, with equal bin-widths in time ( $\Delta t$ ), for which we find:

$$F(t) = \int_{t-\Delta t}^{t+\Delta t} f(t) dt = e^{-\lambda t} 2 \sinh(\lambda \Delta t). \quad (\text{S6})$$

The histogram of experimental inter-arrival times was fitted by Eqn. S6 with  $\Delta t = 10$  s using a nonlinear least squares fitting procedure, to obtain  $\lambda = 0.011 \pm 0.001 \text{ s}^{-1}$ , see Fig. S1.

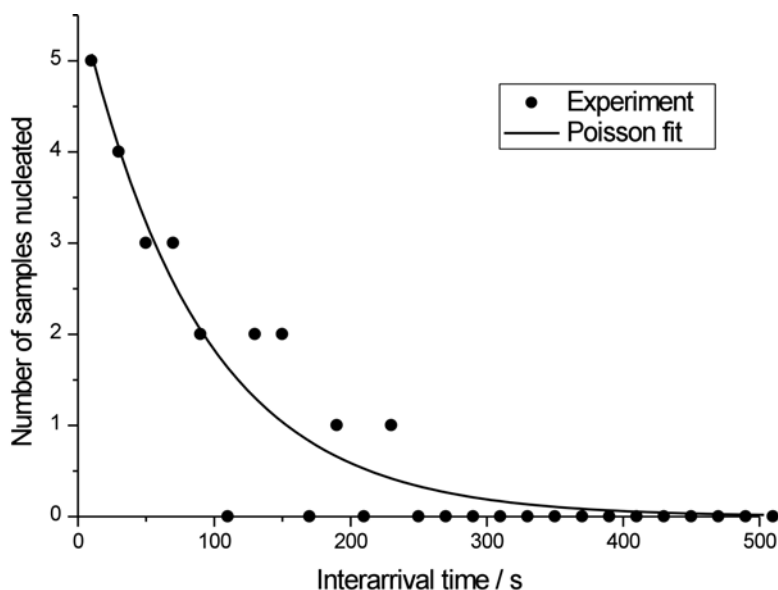

**Fig. S1.** Plot of number of samples nucleated versus interarrival time for 26 samples cooled to 248 °C and maintained at this temperature until nucleation (see Table 1 and text of accompanying communication for details). Note that 3 samples nucleated at times,  $t > 500$  s, which were included in the fit but are not shown.

## References

- [1] F. A. Haight, *Handbook of the Poisson Distribution*, John Wiley & Sons, New York, 1967.
- [2] J. K. Lindsey, *Introduction to Applied Statistics: a Modelling Approach*, 2nd ed., Oxford University Press, Oxford, 2004.
